# Supplementary material
Source: HighWire-hosted journal article supplement (https://bmjopen.bmj.com/content/12/2/e056629)
Supplement: inline-supplementary-material-1 [file inline-supplementary-material-1.pdf]

### Core Outcome Set-STANDARDISED Protocol Items (COS-STAP) Checklist for the iCHOOSE Study

| Item Number | Name                                                                                                                  | Location                                                                                               |
|-------------|-----------------------------------------------------------------------------------------------------------------------|--------------------------------------------------------------------------------------------------------|
| 1           | Identify in the title that the paper describes the protocol for the planned development of a COS                      | TITLE/ABSTRACT<br>Page 1                                                                               |
| 2           | Provide a structured abstract                                                                                         | ABSTRACT<br>Page 1-2                                                                                   |
| 3           | Describe the background and explain the rationale for developing the COS                                              | INTRODUCTION<br>Page 3-4                                                                               |
| P           | Describe the specific objectives with reference to developing a COS                                                   | INTRODUCTION and AIMS<br>AND OBJECTIVES<br>Page 4                                                      |
| 5           | Describe the health condition(s) and population(s) that will be covered by the COS                                    | INTRODUCTION AND<br>METHODS AND ANALYSIS<br>Page 5<br><br>[Scope – Health Condition and<br>Population] |
| 6           | Describe the intervention(s) that will be covered by the COS                                                          | INTRODUCTION AND<br>METHODS AND ANALYSIS<br>[Scope – Intervention]<br>Page 5                           |
| 7           | Describe the setting(s) that will be covered by the COS                                                               | INTRODUCTION AND<br>METHODS AND ANALYSIS<br>Page 5                                                     |
| 8           | Indicate the COS study registration details and registry name. If not yet registered indicate the intended registry   | REGISTRATION DETAILS<br>Page 2                                                                         |
| 9           | Describe any study oversight committees                                                                               | STEERING COMMITTEE AND<br>PATIENT AND PUBLIC<br>INVOLVEMENT<br>Page 5 & 6                              |
| 10          | Describe sources of funding, role of funders                                                                          | FUNDING STATEMENT Page<br>13-14                                                                        |
| 11          | Describe any potential conflicts of interest within the study team and how these will be managed                      | CONFLICTS OF INTEREST<br>Page 14                                                                       |
| 12          | Describe the stakeholder groups to be involved in the COS development process and the rationale for their involvement | METHODS –STAKEHOLDERS<br>Page 9-10                                                                     |

|    |                                                                                                                                               |                                                                          |
|----|-----------------------------------------------------------------------------------------------------------------------------------------------|--------------------------------------------------------------------------|
| 13 | Describe the eligibility criteria for individuals from each stakeholder group                                                                 | METHODS –STAKEHOLDERS<br>Page 9-10                                       |
| 14 | Describe how individuals of each stakeholder groups will be identified                                                                        | METHODS –STAKEHOLDERS<br>Page 9-10                                       |
| 15 | Describe how individuals of each stakeholder group will be chosen from within the stakeholder group                                           | METHODS –STAKEHOLDERS<br>Page 9-10                                       |
| 16 | Describe how many planned individuals within each stakeholder group will be invited to participate in the consensus process                   | METHODS –STAKEHOLDERS<br>[Participants – Sample Size]<br>Page 10         |
| 17 | Describe how individuals will be invited to take part in the consensus process                                                                | METHODS –STAKEHOLDERS<br>Page 10                                         |
| 18 | Describe the information sources that will be used to identify the list of outcomes. Outline the methods or reference other protocols/papers. | METHODS – SYSTEMATIC<br>REVIEW AND QUALITATIVE<br>INTERVIEWS<br>Page 6&7 |
| 19 | Describe how outcomes may be dropped/combined, with reasons                                                                                   | METHODS<br>Page 11                                                       |
| 20 | Describe the methods to identify outcome descriptor terms                                                                                     | METHODS<br>Page 8&9                                                      |
| 21 | Describe the plans for how the consensus process will be undertaken                                                                           | METHODS<br>Page 9-12                                                     |
| 22 | Describe what information will be presented to participants at the start of the consensus process                                             | METHODS<br>Page 8-9                                                      |
| 23 | Describe what each participant will be asked to do at each stage of the consensus process                                                     | METHODS<br>Page 11                                                       |
| 24 | Describe how the participants will receive any feedback during the consensus process                                                          | METHODS<br>Page 11                                                       |
| 25 | Describe how non-response (or partial response) will be handled during the consensus process                                                  | METHODS<br>Page 11                                                       |
| 26 | Describe how the study material will be made patient friendly and understandable (if relevant)                                                | METHODS<br>Page 8-9                                                      |
| 27 | Describe the consensus definition                                                                                                             | METHODS Page 11-12                                                       |
| 28 | Describe the procedure for determining how outcomes will be added/combined/dropped from consideration during the consensus process            | METHODS<br>Page 11                                                       |
| 29 | Describe how outcomes will be scored and summarised                                                                                           | METHODS<br>Page 11                                                       |

|    |                                                                                                                                                     |                                                           |
|----|-----------------------------------------------------------------------------------------------------------------------------------------------------|-----------------------------------------------------------|
| 30 | Describe how the response rate will be maximised                                                                                                    | METHODS<br>Page 10                                        |
| 31 | Describe how attrition bias will be assessed                                                                                                        | METHODS<br>Page 11                                        |
| 32 | Describe any software that will be used during the consensus process and to analyse the results                                                     | METHODS<br>Page 10                                        |
| 33 | Describe any plans for obtaining research ethics committee / institutional review board approval in relation to the consensus process (if relevant) | ETHICS/ DISSEMINATION<br>Page 13                          |
| 34 | Describe how informed consent will be obtained (if relevant)                                                                                        | ETHICS/ DISSEMINATION &<br>METHODS<br>Page 7,9, 10, 11,12 |
| 35 | Describe any details about how the confidentiality of data collection will be preserved during the consensus process (if relevant)                  | METHODS<br>Page 10-11                                     |
